# Supplementary material
Source: MDPI journal article supplement (https://www.mdpi.com/1999-4907/13/7/1051)
Supplement: s1 [file s1]

## Supplementary Materials

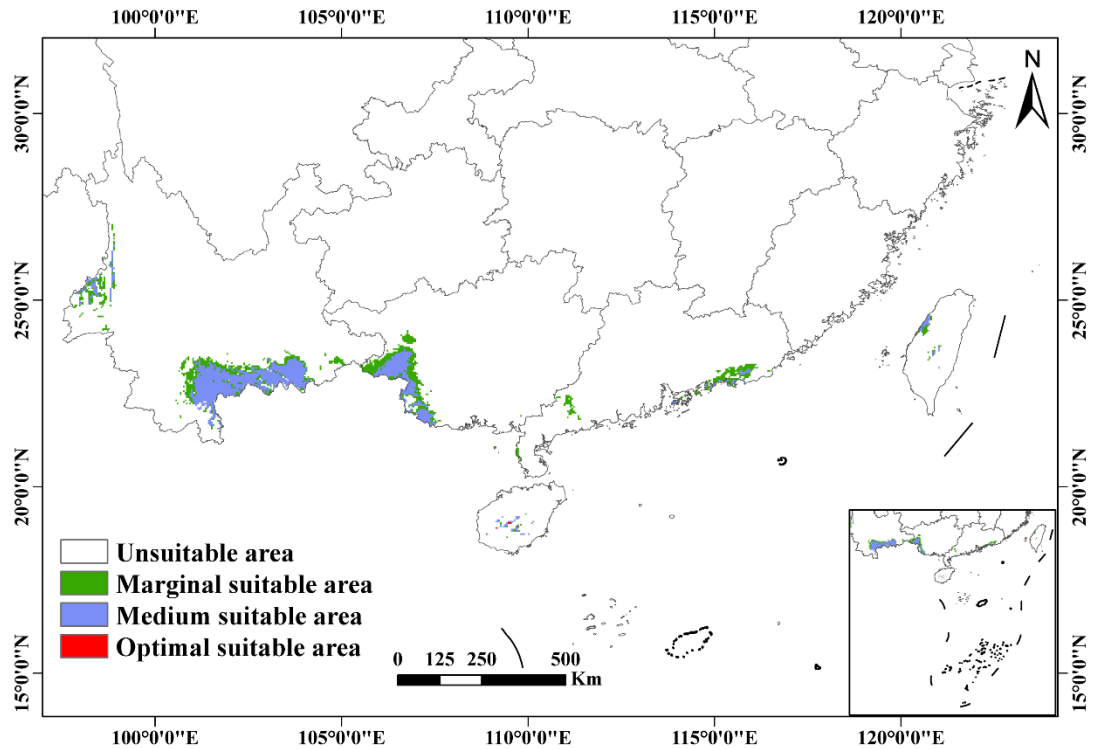

**Figure S1.** Projected potential distribution maps of *H. tetratempala* under the current conditions.

**Table S1.** The geographic coordinates used to generate the potential distribution models of *H. tetratempala*.

| Species                         | Latitude | Longitude |
|---------------------------------|----------|-----------|
| <i>Horsfieldia tetratempala</i> | 21.60    | 101.56    |
| <i>Horsfieldia tetratempala</i> | 21.69    | 107.56    |
| <i>Horsfieldia tetratempala</i> | 21.98    | 101.15    |
| <i>Horsfieldia tetratempala</i> | 22.15    | 107.06    |
| <i>Horsfieldia tetratempala</i> | 22.23    | 107.06    |
| <i>Horsfieldia tetratempala</i> | 22.27    | 107.10    |
| <i>Horsfieldia tetratempala</i> | 22.48    | 106.94    |
| <i>Horsfieldia tetratempala</i> | 22.52    | 101.44    |
| <i>Horsfieldia tetratempala</i> | 22.52    | 103.02    |
| <i>Horsfieldia tetratempala</i> | 22.52    | 103.10    |
| <i>Horsfieldia tetratempala</i> | 22.52    | 106.81    |
| <i>Horsfieldia tetratempala</i> | 22.52    | 106.85    |
| <i>Horsfieldia tetratempala</i> | 22.56    | 102.23    |
| <i>Horsfieldia tetratempala</i> | 22.56    | 103.15    |
| <i>Horsfieldia tetratempala</i> | 22.56    | 107.40    |
| <i>Horsfieldia tetratempala</i> | 22.60    | 102.31    |
| <i>Horsfieldia tetratempala</i> | 22.65    | 102.31    |
| <i>Horsfieldia tetratempala</i> | 22.65    | 103.02    |
| <i>Horsfieldia tetratempala</i> | 22.69    | 103.90    |
| <i>Horsfieldia tetratempala</i> | 22.69    | 103.94    |

|                                |       |        |
|--------------------------------|-------|--------|
| <i>Horsfieldia tetratopala</i> | 22.73 | 103.98 |
| <i>Horsfieldia tetratopala</i> | 22.77 | 106.81 |
| <i>Horsfieldia tetratopala</i> | 22.81 | 102.23 |
| <i>Horsfieldia tetratopala</i> | 22.85 | 102.19 |
| <i>Horsfieldia tetratopala</i> | 22.90 | 102.40 |

**Table S2.** Area of *Horsfieldia tetratopala* under different suitability classes (km<sup>2</sup>) under current and future periods (2050s and 2070s) in MIROC6 and BCC-CSM2-MR models.

| Model       | Historical periods | Unsuitable | Marginal | Medium   | Optimal |
|-------------|--------------------|------------|----------|----------|---------|
|             | Current            | 9544801.79 | 23396.42 | 31749.80 | 69.32   |
| MIROC6      | 2050 (SSP1-2.6)    | 9552184.66 | 22096.61 | 25597.41 | 121.31  |
|             | 2050 (SSP2-4.5)    | 9547609.36 | 27070.52 | 25320.12 | 0.00    |
|             | 2050 (SSP3-7.0)    | 9548250.59 | 21039.44 | 30692.63 | 17.33   |
|             | 2050 (SSP5-8.5)    | 9490678.08 | 41576.30 | 67745.62 | 0.00    |
|             | 2070 (SSP1-2.6)    | 9551248.80 | 20918.13 | 27815.74 | 17.33   |
|             | 2070 (SSP2-4.5)    | 9546049.60 | 29514.15 | 24384.26 | 51.99   |
|             | 2070 (SSP3-7.0)    | 9526673.90 | 24852.19 | 48213.95 | 259.96  |
|             | 2070 (SSP5-8.5)    | 9523762.35 | 36827.69 | 39323.31 | 86.65   |
| BCC-CSM2-MR | 2050 (SSP1-2.6)    | 9547626.69 | 23725.70 | 28647.61 | 0.00    |
|             | 2050 (SSP2-4.5)    | 9527037.84 | 40900.40 | 32061.75 | 0.00    |
|             | 2050 (SSP3-7.0)    | 9513658.56 | 36065.14 | 50224.31 | 51.99   |
|             | 2050 (SSP5-8.5)    | 9510244.42 | 42286.86 | 47468.73 | 0.00    |
|             | 2070 (SSP1-2.6)    | 9549498.40 | 18422.51 | 32061.75 | 17.33   |
|             | 2070 (SSP2-4.5)    | 9536881.67 | 30519.32 | 32287.05 | 311.95  |
|             | 2070 (SSP3-7.0)    | 9537054.98 | 32304.38 | 30640.64 | 0.00    |
|             | 2070 (SSP5-8.5)    | 9525460.75 | 41316.34 | 33222.91 | 0.00    |
